# Supplementary material
Source: publisher figshare collection journal article supplement (https://gsajournals.figshare.com/ndownloader/files/14394599)
Supplement: Supplementary file 1 [file 14394599]

## Sheet: removed small RNAs
Dataset S2. List of Removed Candidate miRNAs
Levashina and Jinsong labs Ag miRNA list
miRNA name	sequence	reason removed
miR-N5-3p	TTGGGCGCTATCTACAATGTAG	repetitive
miR-N6-3p	TATGACTTGTCTGCCTGAGCAAGG	same as miR-N3
miR-N7-3p	GTGGAACCGCGTAGGCTGCCT	repetitive
miR-N13-5p	AGCTGTTCTGACTTGATGTACT	repetitive
miR-PN1-5p	ATTAGAATGTGGAATCTGTTTTT	same as miR-10365
miR-PN2-3p	TGAACACCCATTTATTGCCGACAGG	repetitive
miR-PN3-3p	CCCTGTGGAACACCATGTACGATGG	repetitive
miR-PN7-3p	CAGTACTTCTGCAATGCAACCC	same as miR-33
miR-PN9-3p	GATTTGTCCAAAAAGGATG	repetitive
miR-PN10-5p	AGGATTACGATGAAGTGTTTGCGCC	repetitive
miR-PN11-5p	ACACGATAAGAGGAAAGTTTACG	repetitive
miR-PN14-5p	TTGACTGTCGCCTCTGCGGATG	repetitive
miR-PN22-3p	TAGACGATTTCGGAATGGCACATCC	repetitive
miR-PN23-3p	CCGGTGAACTGCTGTGCAGGGGCGC	repetitive
miR-PN24-3p	TCCGGCTACCGACTAACGGCTC	repetitive
miR-PN25-3p	ACTCCGGTCGACTCTGGACGAC	repetitive
miR-PN28-3p	AATTGGACTCTATAGCACCCT	repetitive
miR-PN31-5p	TACTTTCGCAAATAGATCGCTGCCT	repetitive
miR-PN36-5p	AATTGGACTCTGTGGCACCCT	repetitive
miR-PN37-3p	CGCTCGACTATTTATCGCCCGAGA	repetitive
miRBase A. gambiae v22
miRNA name	5p	3p	reason removed
miR-10356-1	ttcattgaaatgaagtttggctgga	cagtaaaaaagttttcaatgggtagcct	repetitive
miR-10356-2	ttcattgaaatgaagtttggctgga	cagtaaaaaagttttcaatgggtagcct	repetitive
miR-10357	ccagaacctggtgctgcaagctgcc	tctgatgttctgcgcccacctgaaa	repetitive
miR-10358-1	tgagaagtaactgttaaaactatgt	tgtcattttcttttgctcctcgatgtt	repetitive
miR-10358-2	tgagaagtaactgttaaaactatgt	tgtcattttcttttgctcctcgatgtt	repetitive
miR-10358-3	tgagaagtaactgttaaaactatgt	tgtcattttcttttgctcctcgatgtt	repetitive
miR-10358-4	tgagaagtaactgttaaaactatgt	tgtcattttcttttgctcctcgatgtt	repetitive
miR-10358-5	tgagaagtaactgttaaaactatgt	tgtcattttcttttgctcctcgatgtt	repetitive
miR-10359	tcattgagcaattcgtcgtccgtat	taaggatgacccggccaaagttgaagg	repetitive
miR-10360	tagttgagaagacgctgagccgccc	tggacttggcttatcctgcactacgg	repetitive
miR-10361a-1	acacgataagaggaaagtttacg	taaatgatccttttatcgtgtac	repetitive
miR-10361a-2	acacgataagaggaaagtttacg	taaatgatccttttatcgtgtac	repetitive
miR-10361a-3	acacgataagaggaaagtttacg	taaatgatccttttatcgtgtac	repetitive
miR-10361b	acacgataagaggacagtttacg	taaatggtctttttatcgtgtac	repetitive
miR-10362	tcgatgatccgcggctccgcagcgc	tgtagtgtggccgcgctccaagcaacgg	repetitive
miR-10363	cgcgcttgggccgctcagccggtac	ccggtgaactgctgtgcaggggcgc	repetitive
miR-10364	cccattccacagcatcaccaga	tatgatgctgttgatgggat	repetitive
miR-10371	tgtttgattttggatacggtcgcca	tgacatgtattgaggtagaata	repetitive
miR-10374		ctttgtttaaattgtttgtcgcc	repetitive
miR-10375a	acatcatagaaagtgttaatgcg	taatgcgctttctatgatgtag	repetitive
miR-10375b-1	acattgtagaaagggtcaaaatg	ttgggcgctatctacaatgtag	repetitive
miR-10375b-2	acattgtagaaagggtcaaaatg	ttgggcgctatctacaatgtag	repetitive
miR-10375b-3	acattgtagaaagggtcaaaatg	ttgggcgctatctacaatgtag	repetitive
miR-12413		tatgacttgtctgccagagcaagggg	repetitive
miR-12415		cgattgtggaaccgcgtaggctgcct	repetitive
miR-12419	agctgttctgacttgatgtact		repetitive
